# Supplementary figures and images for: A de novo Ser111Thr variant in aquaporin-4 in a patient with intellectual disability, transient signs of brain ischemia, transient cardiac hypertrophy, and progressive gait disturbance
Source: PubMed Central journal article supplement — Cold Spring Harb Mol Case Stud. 2018 Feb;4(1):a002303. doi: 10.1101/mcs.a002303 (PMC5793774; doi:10.1101/mcs.a002303), 2018-02

Supplementary Figure 1

A

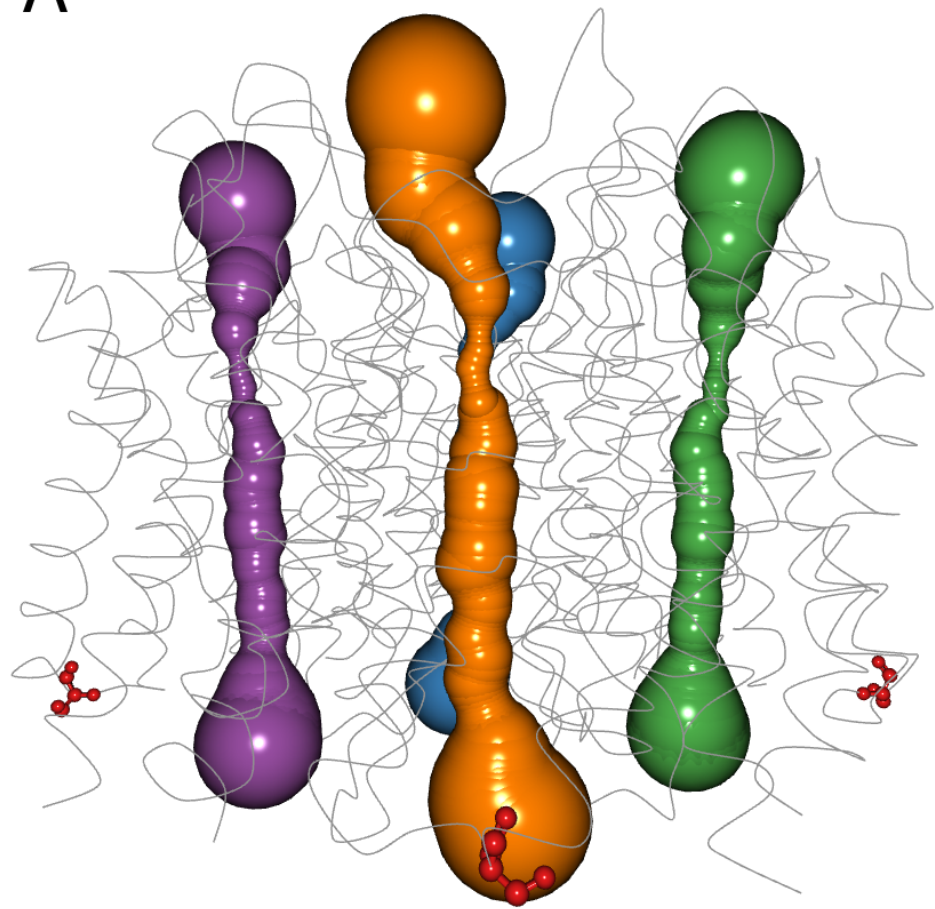

B

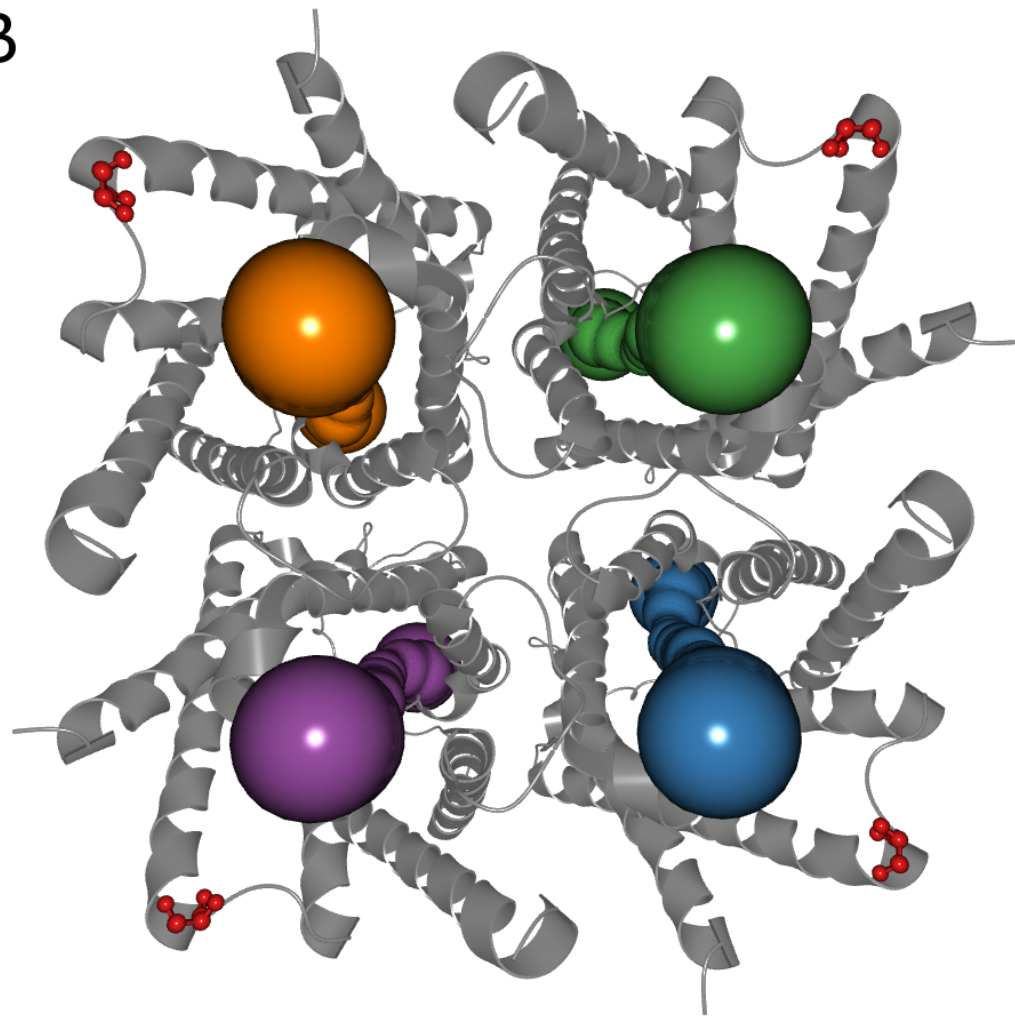

Supplementary Figure 2

A

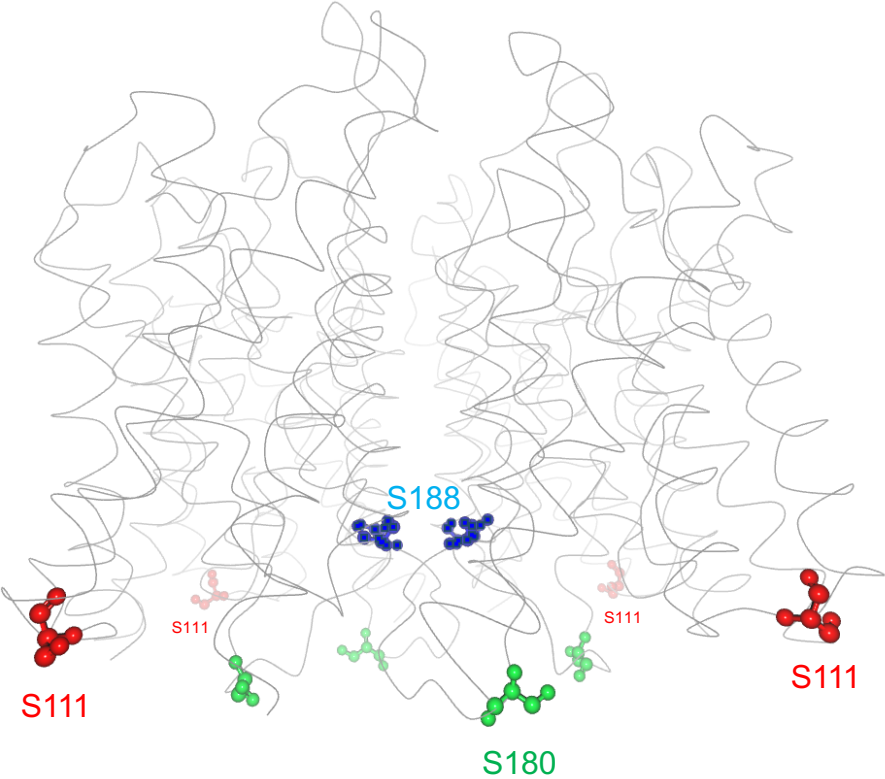

B

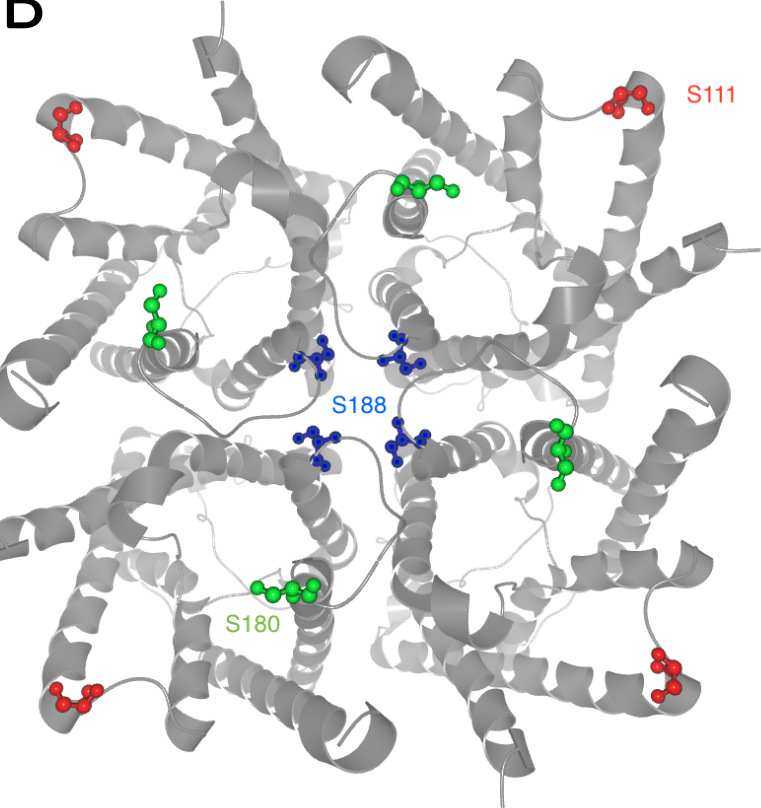

Supplement: supp_mcs.a002303_Supplemental_Figures.pdf [file supp_mcs.a002303_Supplemental_Figures.pdf]
